# Supplementary material for: Educating Young Consumers about Food Hygiene and Safety with SafeConsume: A Multi-Centre Mixed Methods Evaluation
Source: MDPI journal article supplement (doi:10.3390/educsci12100657), 2022-09-28
Supplement: s1 [file s1]

Archive with 1 entries (1 files):
- education-1884690-supplementary.pdf
